1 **Cryo-EM structure of DNA polymerase  $\theta$  helicase domain in complex with**  
2 **inhibitor novobiocin**

3 Hanbo Guo<sup>1,2</sup>, YanXia Wang<sup>1,2</sup>, Jun Mao<sup>1,2</sup>, Huimin Zhao<sup>1</sup>, Yuntong He<sup>1</sup>, Yuandong Hu<sup>1</sup>, Jing  
4 Li<sup>1</sup>, Yujie Liu<sup>1</sup>, Zheng Guan<sup>1</sup>, Allen Guo<sup>1</sup>, Xiaodan Ni<sup>1,\*</sup>, Fengying Zhang<sup>1,\*</sup>, Jie Heng<sup>1,\*</sup>

5  
6 **Affiliations:**

7 <sup>1</sup>Shuimu BioSciences Ltd., Life Science Park, Changping District, Beijing 102206, China

8 <sup>2</sup>These authors contributed equally: Hanbo Guo, Yanxia Wang, Jun Mao

9  
10

11 \*Correspondence:

12 nixiaodan@shuimubio.com (X.N.), zhangfengying@shuimubio.com(F.Z.), or

13 hengjie@shuimubio.com (J.H.)

14

15

16

1 **Abstract**

2 DNA double-strand breaks (DSBs) are highly toxic lesions that occur during the cellular  
3 metabolic process. DNA Polymerase theta (Pol $\theta$ ) is an error-prone polymerase that has  
4 been implicated in the repair of chromosome breaks, recovery of broken replication  
5 forks, and translesion synthesis. The inhibition of Pol $\theta$  activity has been implicated in  
6 killing HR-deficient tumor cells *in vitro* and *in vivo*. We present the first biochemical  
7 evidence that the antibiotics novobiocin (NVB) noncompetitively inhibit ATP hydrolysis  
8 by the ATPase domain of the Pol $\theta$  helicase domain (Pol $\theta$ -HLD). We report the Cryo-EM  
9 structure of apo dimeric Pol $\theta$  helicase domain (Pol $\theta$ -HLD), and the first inhibitor  
10 occupied Pol $\theta$ -HLD structure. Our structure identifies a non-canonical novobiocin  
11 binding pocket, distinct from the canonical site that partially overlaps with the ATP in the  
12 ATPase domain. Comparison with the homolog helicase Hel308-DNA duplex complex  
13 suggests that the novobiocin competitively binds to a triangle hub on the DNA  
14 translocation pathway and blocks the ssDNA binding and translocation. Furthermore,  
15 the first dimeric structure of Pol $\theta$ -HLD also provides a structural framework for revealing  
16 the microhomology-mediated end-joining mechanism. Our results demonstrate that the  
17 inhibitor-occupied structure combined with rational, structure-based drug design will  
18 undoubtedly accelerate the discovery of potent inhibitors with better efficacy and target  
19 selectivity to human Pol $\theta$ .

## 1 **Introduction:**

2 Stochastic DNA double-strand breaks (DSBs) are one of the most deleterious types of  
3 DNA lesions in eukaryotic cells<sup>1</sup>. The inability to repair properly to DNA damage may  
4 lead to genetic instability and cell death, which in turn may enhance the rate of cancer  
5 development<sup>2,3</sup>. There are two distinct and complementary mechanisms for DNA DSB  
6 repair: homologous recombination (HR)<sup>4</sup> and canonical non-homologous end-joining  
7 (NHEJ)<sup>5</sup>. Nevertheless, many cancer types that are deficient in HR- and NHEJ-  
8 dependent proteins can rely on a third DSB repair pathway, DNA polymerase theta  
9 (Pol $\theta$ )-mediated end joining (TMEJ), which is an alternative error-prone DSB repair  
10 pathway that uses sequence microhomology to recombine broken DNA ends<sup>6</sup>.  
11 Accordingly, Pol $\theta$  is synthetic lethal with a number of genes frequently mutated in  
12 cancer, including HR factors<sup>7</sup> and DNA damage response genes<sup>8</sup>. Developing first-in-  
13 class Pol $\theta$ -targeting inhibitors in combination with other synthetic lethal inhibitors  
14 represents a novel therapeutic strategy for cancer treatment.

15 Pol $\theta$  is a multifunctional enzyme that contains an N-terminal conserved superfamily 2  
16 helicase domain (Pol $\theta$ -HLD), an unstructured central region, and a C-terminal A-family  
17 DNA polymerase domain (Pol $\theta$ -POL)<sup>9</sup>. Pol $\theta$  can bind to long single-stranded DNA  
18 (ssDNA) overhangs generated by 5'–3' resection of DSBs and anneals sequences with  
19 2–6 base pairs of microhomology to use them as primers for DNA synthesis<sup>10</sup>. The  
20 structure-function analyses reveal that the Pol $\theta$ -HLD not only has classical ATPase and  
21 helicase activity but also competes with HR factors, like RPA<sup>11</sup> and Rad51<sup>7</sup>, for resected  
22 single-stranded DNA-ends, and the Pol $\theta$ -POL is responsible for DNA synthesis either  
23 using its terminal transferase or templated extension activity. The available crystal  
24 structure of both helicase domain<sup>12</sup> and polymerase domain<sup>13</sup> in combined with *in*  
25 *vitro*<sup>10,14</sup> and *in vivo*<sup>15</sup> biochemical results provide a comprehensive landscape for  
26 analyzing the mechanistic multifunction of the Pol $\theta$ . Recently, selective inhibitors,  
27 ART558<sup>16</sup> and RP-6685<sup>17</sup>, targeting the Pol $\theta$ -POL, is reported and suggested as  
28 promising candidates in synthetic lethality-based anticancer therapy. Although the  
29 helicase domain is also proved indispensable for the translesion synthesis and  
30 microhomology-mediated end-joining (MMEJ) of long ssDNA overhangs, inhibitors

1 targeting this domain are less reported, except an antibiotic novobiocin (NVB)<sup>18</sup>, which  
2 was suggested to inhibit the ATPase activity and phenocopy Pol $\theta$  depletion specifically.  
3 Nevertheless, the structural basis of the NVB binding pocket and the precise molecular  
4 mechanism of how NVB modulates Pol $\theta$ -HLD activity remain compelling questions.

5 Here, we report the Cryo-EM structure of dimeric Pol $\theta$ -HLD in the apo and in complex  
6 with inhibitor NVB. The NVB, a well-known aminocoumarin antibiotic that inhibits the  
7 ATPase activity of Pol $\theta$ -HLD with a half-maximum inhibitory concentration of 24  $\mu$ M,  
8 was predicted to bind to a tunnel within the Pol $\theta$  ATPase domain through molecular  
9 docking. Inconsistent with the docking model, our structure reveals that the NVB binds  
10 to a non-canonical binding pocket formed by domains 1, 2, and 4, which is distinct from  
11 the canonical binding site within the ATPase subunit. The coumarin core moiety of NVB  
12 plays a hub role in stabilizing the interface formed by the ratchet domain and the  
13 ATPase domain, which suggests an allosteric modulation mechanism to the ATPase  
14 activity. Since the Pol $\theta$  exhibits ssDNA-dependent ATPase activity, it was suggested  
15 that ssDNA regulates the ATPase activity of Pol $\theta$  by positively allosteric modulation<sup>9,19</sup>.  
16 Comparison with the homolog helicase Hel308-DNA complex<sup>20</sup> indicates that the NVB  
17 competitively binds to a triangle hub on the DNA translocation pathway and blocks the  
18 ssDNA binding and translocation. Moreover, our Cryo-EM structure validates that Pol $\theta$ -  
19 HLD exhibits dimer in the solution other than the tetramer observed in the crystal  
20 structures. The dimerization of Pol $\theta$ -HLD also provides a structural framework for  
21 understanding the microhomology-mediated end-joining mechanism. Overall, our  
22 results provide structural insight into the inhibitory mechanisms of Pol $\theta$  activity, which  
23 will accelerate the discovery of analog inhibitors with better affinity, efficacy, and  
24 selectivity for clinical cancer treatment.

25

## 26 **Result.**

### 27 **The validation of the inhibitory role of different compounds to Pol $\theta$ -HLD.**

28 In line with the available evidence that Pol $\theta$  can act on 3' ssDNA overhangs to promote  
29 MMEJ of DSBs repair<sup>21</sup>, the ssDNA overhang was suggested to require the Pol $\theta$ -HLD  
30 attachment in a recombinant system with purified full-length Pol $\theta$ <sup>22</sup>. Meanwhile, the

1 purified human Pol $\theta$ -HLD was reported to bind to ssDNA relatively tightly compared with  
2 different types of DNA structures. Therefore, the ATPase activity of Pol $\theta$ -HLD can be  
3 allosterically modulated by ssDNA<sup>19</sup>. Hence, we first set up the ATPase activity assay to  
4 evaluate the functionality of purified Pol $\theta$ -HLD by following a well-established ADP-Glo  
5 luminescent method. The result shows that ssDNA stimulates the ATPase activity in a  
6 concentration-dependent manner with an EC<sub>50</sub> of about 18.3 nM (Figure S1.a). Then,  
7 we test the inhibitor effect of NVB on ATPase activity, which displays an IC<sub>50</sub> of about  
8 13 $\mu$ M (Figure S1.b), similar to the reported value of 24 $\mu$ M<sup>18</sup>. Interestingly, the enzyme  
9 inhibition analysis with different NVB concentrations indicates that the NVB is a  
10 noncompetitive inhibitor to the ATPase activity (Figure S1.c), which contradicts the  
11 hypothesis that the NVB binds near the canonical ATP binding site in the ATPase  
12 subunit, like DNA gyrase<sup>23</sup>. Furthermore, additional results suggest that the NVB  
13 competitively inhibit the ssDNA binding to the Pol $\theta$ -HLD (Figure S1.d).

#### 14 **The overall structure of the Pol $\theta$ -HLD in apo and in complex with NVB**

15 We determine the Cryo-EM structure of the human Pol $\theta$ -HLD in the apo state at 3.27 Å  
16 and in complex with inhibitor NVB at 3.14 Å (Figure 1.a-c). The overall structures of the  
17 apo state and the inhibitor binding state are very similar, with an average root mean  
18 square deviation (r.m.s.d) value of 0.94 Å. Notably, in the Cryo-EM structures, the Pol $\theta$ -  
19 HLD forms a homodimer other than a tetramer observed in the crystal structures<sup>12</sup>. It  
20 was consistent with the hypothesis that dimer may be the minimum unit of this enzyme,  
21 and two Pol $\theta$  protomers can work together to join either side of a DNA break to facilitate  
22 the microhomology annealing step<sup>24</sup>. A detailed summary of the Cryo-EM data  
23 collection, refinement, and validation statistics is given in Table 1.

24 As previously defined<sup>12</sup>, the structure of Pol $\theta$ -HLD consists of five structural domains  
25 (domains 1-5, D1-D5). The N-terminal region of Pol $\theta$ -HLD is composed of two tandem  
26 RecA-like domains (D1 and D2), which consist of several characteristic sequence motifs  
27 that are important for ATP and DNA binding, named motif Q, I, Ia, Ib, and II to VI (Figure  
28 1.a, and Supplementary Figure S2). The middle region is a winged helix domain (D3),  
29 which plays a role as a hinge to permit tightly binding around the DNA substrate. The  
30 fourth and fifth domains are the ratchet domain (D4), which coordinates the DNA  
31 translocation and ATPase function, and the helix-hairpin-helix domain (D5), which

1 interact with the 3' ssDNA tail. All five domains pack together to assemble a ring-shaped  
2 structure (Figure 1.b) as other structural homologs, including archaeal helicases  
3 Hel308<sup>20,25</sup> and Hjm<sup>26</sup>. The central polar tunnel of Polθ-HLD was wrapped by domains  
4 1, 2, and 4 (Figure 1.b).

5 We incubate a 50-fold excess molar ratio of NVB with apo Polθ-HLD at a protein  
6 concentration of 1 mg/mL, and subsequently vitrified for Cryo-EM study. By comparing  
7 with the apo structure, we identify a strip density of NVB in the central tunnel in the  
8 NVB-Polθ-HLD complex structure (Figure 1.c,d). The binding site is in a cleft formed by  
9 D1, D2, and D4, which supports the observation that NVB increases the Polθ stability in  
10 a dose-dependent manner<sup>18</sup>. Furthermore, the extensive positively charged surface  
11 inside and outside the central tunnels, especially the surface from D2 (Figure 1.e),  
12 implies a potential nucleic acid binding interface supported by the reported crystal  
13 structure of DNA duplex-Hel308 complex<sup>27</sup>.

#### 14 **The inhibitor NVB binding sites**

15 Novobiocin is an aminocoumarin antibiotic initially approved in 1964 for the treatment of  
16 severe infections due to susceptible strains of *Staphylococcus aureus*. Since the NVB  
17 functioned as a competitive inhibitor of the ATPase reaction catalyzed by the GyrB  
18 subunit of the bacterial DNA gyrase enzyme, it was suggested that the NVB molecule  
19 partially overlapped with the ATP binding site<sup>23,28</sup>. The canonical NVB binding site is  
20 next to the ATP binding site, with the novobiose sugar overlap with the adenine ring of  
21 ATP. Besides, NVB also binds to other types of target proteins, including  
22 topoisomerase IV (ParE), which is essential for chromosome segregation<sup>30,32</sup>, heat  
23 shock protein 90 (HSP90)<sup>33</sup>, autophagy-related protein LC3A<sup>36</sup>, and lipopolysaccharide  
24 (LPS)-transport proteins<sup>34,35</sup>. In the case of the LPS transporter, the novobiocin binds to  
25 a non-canonical allosteric modulation site away from the ATP binding site.

26 Although the preliminary docking result indicates that NVB bind near the ATP  
27 binding site, the non-competitive evidence from biochemical assay support that the  
28 NVB may bind to a distinct non-canonical site away from the canonical site in the  
29 ATPase domain. Residues form the NVB pocket from the D1, D2, and D4, including  
30 conserved Motif Ia, Motif Ib (part 1), Motif Ib (part 2), Motif II, Motif IVa, and the Ratchet

1 helix (Figure 2.a,b). Notably, the coumarin core moiety plays a hub role in connecting  
2 three domains by forming aromatic contact with Phe422 (Domain 2), hydrogen bond  
3 interaction with nitrogen atom from Val147 and Ser148 (Domain 1), and hydrophobic  
4 interaction with side chains of Val147 (Domain 1), Gln753 (Domain 4). The hydroxyl  
5 benzoate isopentyl group forms hydrophobic contact with several residues, including  
6 Pro145, Phe146, Met220, and Asp223, while the novobiose sugar mainly mediates  
7 interactions through forming hydrogen bonds with the side chain of Lys151 and Thr175,  
8 and weak polar interactions with Glu423, Gln749, and Ser750 (Figure 2.a,b).

9 The three entities of NVB: the hydroxyl benzoate isopentyl group, the coumarin core,  
10 and the novobiose sugar exhibits an extended conformation, which is different from  
11 canonical bend conformation in the ATP binding site (Figure 2.c). In the bend  
12 conformation of NVB revealed by several structural studies<sup>28-31</sup>, the hydroxyl benzoate  
13 isopentyl group folds back away from the solvent onto the coumarin ring. Remarkably,  
14 besides the extensive hydrophobic interactions, two hydrogen bonds on coumarin core  
15 and novobiose sugar are quite similar between NVB and GyrB (Figure 2.d). Figure 2.e  
16 shows the distinction between non-canonical NVB binding site and ATP binding pocket  
17 (ADP model from PDB ID: 5a9f), located in the interface of domain 1 and domain 2<sup>12</sup>.  
18 Due to the slight flexibility of the hydroxyl benzoate isopentyl group and the novobiose  
19 moiety in the pocket, they show a worse density in the other protomer compared with  
20 the coumarin core. Because of the peculiar physicochemical features, the coumarin  
21 moiety represents a privileged scaffold for bioactive compound<sup>37</sup>. The structural  
22 information of NVB-Pol $\theta$ -HLD will provide a structural framework for compound  
23 optimization. Therefore, it is possible to develop some coumarin derivatives that exhibit  
24 higher affinity and better selectivity targeting the Pol $\theta$ -HLD by the computational  
25 approach of structural-based drug design.

## 26 **The inhibitory mechanism by blocking DNA binding**

27 Due to the sequence feature of Pol $\theta$ -HLD being closely related to HELQ/Hel308-type  
28 and RecQ-type helicases, it is not surprising that Pol $\theta$ -HLD exhibits both DNA  
29 unwinding and annealing activities like them<sup>38</sup>. Purified Pol $\theta$ -HLD can unwind several  
30 types of DNA substrates with 3'-5' polarity, including replication forks<sup>7</sup>, blunt-ended

1 DNA, and DNA with 3' or 5' overhangs<sup>39</sup>, but preferentially unwinds DNA with 3'  
2 overhangs. Meanwhile, the Polθ-HLD was also proved to exhibit DNA annealing  
3 activity<sup>11</sup>, which it promotes ssDNA annealing in an ATP-independent manner.  
4 Polθ-HLD can bind to ssDNA and exhibit bidirectional scanning on the ssDNA<sup>40</sup>. The  
5 central tunnel of Polθ-HLD formed by multiple domains represents a putative pathway  
6 that ssDNA translocated. As demonstrated in the complex of HEL308 with a partially  
7 unwound DNA-duplex substrate, D2 binds the DNA duplex by the extensive positively  
8 charged region near the central tunnel and melts the DNA-duplex by a β-hairpin loop.  
9 The unwound 3' tail ssDNA paths through the central tunnel and subsequently  
10 interacted with residues from all five domains at different base positions<sup>20</sup>, which  
11 provides valuable insights into the ssDNA binding mode and the duplex-unwinding  
12 mechanism for this family<sup>20</sup>. Since the first step in a simplified TMEJ model is the  
13 recognition and binding of Polθ-HLD to ssDNA tail<sup>6</sup>, an ideal inhibitor can likely block  
14 the initial ssDNA recognition step by competing for the protein-DNA interaction.

15 To gain insight into the inhibitory mechanism by NVB, we superpose the inhibitor-  
16 bounded Polθ-HLD structure to the homologous Hel308-DNA complex<sup>20</sup> (Figure 3.a).  
17 Although the overall structures of Polθ-HLD and Hel308 are similar, differential  
18 conformational changes happen in different domains. The r.m.s.d values of individually  
19 superposing five domains (D1-D5, 1.3, 1.1, 1.1, 3.0, and 0.9, respectively) indicate that  
20 the D4 exhibit the most extensive global conformational changes. It's reasonable when  
21 considering the fact that D4 coordinates nucleotide base moiety with D1 and D2 and  
22 provides an ideal ratchet for the bidirectional progression of the ssDNA tail, energizing  
23 by ATP hydrolysis in an inchworm-like transport mechanism<sup>20</sup>. Meanwhile, the  
24 movement of each domain in the DNA-bound modeling state enables a larger space in  
25 the central tunnel, which implies conformational changes when ssDNA and DNA duplex  
26 binds to the Polθ-HLD. Notably, in the modeling complex, the NVB overlap with 3'  
27 overhang ssDNA (Figure 3.a). In the Polθ-HLD-NVB complex, the NVB vertically  
28 wedges between the overhang ssDNA's third and fourth unpaired bases (Figure 3.b).  
29 Amino acids from motif 1a (Val147, Ser148, and Lys151) and motif 1b (part1) (Thr175)  
30 in Polθ-HLD interact with the different parts of NVB moiety by hydrogen bond  
31 interaction, while the equivalent residues at motif 1a and 1b (part1) in Hel308 directly



1 interact with the DNA backbone of the third and fourth unpaired bases. Therefore, the  
2 NVB inhibitor competitively occupied the DNA translocation pathway resulting in the  
3 blocking of initial DNA recognition. Considering the activity difference of ssDNA (EC50  
4 about 300nM) and NVB (IC50 about 14uM) to Pol $\theta$ -HLD, respectively, the NVB at  
5 micromolar level affinity is not an ideal candidate inhibitor for clinical treatment. Further  
6 structural-based optimization may enable the discovery of low nanomolar potency  
7 derivatives with better target selectivity.

## 8 **The homodimer interfaces**

9 Dimerization plays a role in forming DNA synaptic complexes in the DSB repair  
10 processes<sup>14,42–44</sup>, including the NHEJ, HR, and TMEJ process. Dimeric proteins or  
11 protein complexes can tether DNA end breaks together and facilitating the formation of  
12 intermediate DNA synaptic end complexes. Previous *in vitro* study suggests that  
13 although the purified Pol $\theta$ -POL can perform MMEJ on short ssDNA, full-length POLQ is  
14 essential for MMEJ on long ssDNA with a dimeric model<sup>14</sup>, in which the Pol $\theta$ -HLD can  
15 not only bridge two DNA end breaks together but also suppress the intrastrand pairing  
16 activity of long ssDNA.

17 Consistent with the previous model, the apo dimeric Pol $\theta$ -HLD shares a similar dimer  
18 interface formed by chain A and chain C in the tetramer Pol $\theta$ -HLD (PDB: 5A9J), which  
19 is mainly contributed by interchain hydrogen bonds and hydrophobic contact from D4.  
20 Interestingly, we find that the dimeric interface of apo Pol $\theta$ -HLD in the Cryo-EM  
21 structure is slightly less extensive than in the crystal structure (580 Å<sup>2</sup> vs. 850 Å<sup>2</sup>  
22 interface area, calculated by the PDBePISA server<sup>45</sup>), which reflects the structural  
23 flexibility of dimer complex in solution. In contrast, probably due to the stabilization  
24 effect of inhibitors on inter-domain dynamics, the NVB-occupied structure exhibits a  
25 larger extent of dimer interface than the apo structure (857 Å<sup>2</sup>). Meanwhile, we also  
26 observed some extent of conformational change in D5, resulting in forming an  
27 interprotomer hydrogen bond between Arg791 and Asn773. Likewise, the  
28 conformational change of D5 was also proposed to modulate the DNA binding or other  
29 partner interaction with an autoinhibitory mechanism<sup>25,39</sup>. Because the dimerization of  
30 Pol $\theta$ -HLD will bring the 3' ssDNA overhangs in close proximity, it was suggested that it

1 could directly catalyze the annealing reaction of complementary DNA<sup>11,19</sup> or facilitate the  
2 DNA annealing activity of Pol $\theta$ -POL by bidirectional movement as a dimer on the long  
3 ssDNA<sup>14</sup>. Although the inhibitor binding site we characterized here is far from the  
4 dimerization site, small molecules or antibodies targeting the dimeric interface may  
5 exhibit an inhibitory effect on Pol $\theta$  functionality.

## 6 **Discussion:**

7 Mammalian cells have evolved multiple pathways to repair DNA double-strand breaks  
8 (DSBs) and ensure genome stability. The specific mechanism of how the TMEJ  
9 involving has received increasing attention in recent years. Because Pol $\theta$  is an error-  
10 prone polymerase, it repairs the DNA ends by annealing micro-homologous sequences  
11 resulting in deletions and insertions in the break sites. As a result, this type of repair can  
12 promote genetic instability in the early stage of tumorigenesis to promote cancer  
13 progression. Therefore, the Pol $\theta$  gene is upregulated in numerous cancers, and its  
14 overexpression is associated with poor prognosis. Developing Pol $\theta$  inhibitors represents  
15 a promising clinical treatment strategy<sup>46–48</sup>.

16 Here, we report the inhibitor-occupied structure of Pol $\theta$ -HLD and characterize a  
17 promising allosteric inhibitor binding site distinct from the canonical ATP binding site.  
18 Notably, the inhibitor binds to a putative ssDNA translocation pathway, which blocks  
19 ssDNA binding. NVB is an antibiotic<sup>49</sup> that has been withdrawn from the market due to  
20 some unfavorable safety profiles and was recently proven to effectively mediate HR-  
21 deficient tumor cell death by targeting Pol $\theta$ -HLD<sup>18</sup>. Strikingly, NVB was historically  
22 reported to have an inhibitory effect on DNA repair<sup>50,51</sup>, and it was actually the subject of  
23 oncology trials in phase 1<sup>52,53</sup> and phase 2 studies<sup>54</sup>, combined with high-dose  
24 chemotherapy. Moreover, NVB was also used to reverse breast cancer resistance  
25 protein-mediated drug resistance<sup>55</sup>. The low potency of NVB to Pol $\theta$ -HLD will restrict the  
26 development of clinical cancer treatment. Although the NVB is well-known for its  
27 coumarin scaffold moiety, which usually competitively binds to the ATP binding pocket,  
28 the Pol $\theta$ -HLD-NVB complex structure indicates that NVB allosterically binds to Pol $\theta$ .  
29 Because the coumarin moiety pivots the domain-domain interactions and blocks ssDNA

1 interaction, other NVB analogs that keep the coumarin moiety may exhibit a similar  
2 inhibitory effect. Actually, a series of novobiocin analogs have been developed to  
3 investigate the antiproliferative activity against several cancer cell lines but were  
4 supposed to be selective to target HSP90<sup>56,57</sup>. Still, those compounds' inhibitory efficacy  
5 and selectivity on Pol $\theta$ -HLD haven't been reported. Collectively, a structural-based hit  
6 optimization strategy will accelerate the discovery of analog compounds with higher  
7 affinity, better efficacy, and selectivity for clinical treatment.

8 In summary, our structure provides a structural insight into how NVB inhibits Pol $\theta$ -  
9 HLD activity. Directly competing ssDNA binding sites represent a straightforward  
10 strategy to develop Pol $\theta$ -HLD inhibitors. Since both Pol $\theta$ -HLD<sup>18</sup> and Pol $\theta$ -POL<sup>16</sup>  
11 inhibitors demonstrate selective toxicity in BRCA1/2-deficient cancer cells, patients  
12 harboring cancer-specific alterations in specific genes might benefit from clinical Pol $\theta$   
13 inhibitor treatment. Despite the revolutionary efficacy of PARP inhibitors for the  
14 treatment of BRCA-mutated tumors, the acquisition of PARP inhibitor resistance has  
15 been observed in many patients. Therefore, PARP inhibition combined with Pol $\theta$   
16 inhibition can be a promising synthetic lethal therapeutic strategy to improve cancer  
17 treatment.

## 18 **Methods:**

### 19 **Expression and purification of the human Pol $\theta$ -HLD**

20 A truncated version of the human Pol $\theta$ -HLD (residues 67-940) was cloned into the  
21 pFastBac-1 vector with an amino-terminal 8 $\times$ His tag and a carboxy-terminal Twin-Strep-  
22 tag. The protein was expressed in the Sf9 insect cell (Expression system) in the  
23 ESF921 medium using the Bac-to-Bac baculovirus system. The purification of the Pol $\theta$ -  
24 HLD protein is mainly referring to the methods described previously with slight  
25 modification<sup>19</sup>. Briefly, the Pol $\theta$ -HLD protein was expressed for 48 hours after infection  
26 with recombinant baculovirus, and cells were collected and lysed using a buffer  
27 containing 25 mM Tris (pH 8.5), 500 mM NaCl, 0.5 mM Tris (2-carboxyethyl) phosphene  
28 (TCEP), 0.0025 mg/mL Leupeptin. Ni-NTA affinity purification was used as the initial  
29 purification step and followed by Strep affinity chromatography for further purification.  
30 The eluted proteins were concentrated, aliquoted, and flash-frozen for storage at -80°C.

### 32 **ATPase activity assay**

33 The ATPase activity assay followed a previously established protocol using the ADP-  
34 Glo kinase assay (Promega)<sup>18</sup>. The 30mer ssDNA (5'-

1 CCAGTGAATTGTTGCTCGGTACCTGCTAAC-3') used in the assay was synthesized  
2 from Sangon Biotech. The reaction was done in 20ul condition in 384 optiplate  
3 (PerkinElmer), and the reaction buffer contains 40mM Tris-HCl pH 7.5, 20mM MgCl<sub>2</sub>,  
4 0.01% Triton X-100, 0.01% BSA, and 1mM DTT.

5  
6 The final concentrations were 30 nM of purified Polθ-HLD protein, 20 μM of ATP, and  
7 600 nM of 30mer ssDNA, with DMSO or NVB. The order for adding the  
8 components were: 2.5 μl of 3x NVB or DMSO, 2.5 μl of 3x POLθ (incubate at room  
9 temp for 15 min), and finally, 2.5 μl of 3x mixture containing ATP and ssDNA, and  
10 all components were prepared in 1x reaction buffer. DMSO wells represented 0%  
11 inhibition, while no-enzyme wells represented 100% inhibition. Plates were covered with  
12 an aluminum seal and incubated at room temperature. 2 hours later, 7.5 μl of  
13 ADP-Glo reagent (Promega kit) was added to each reaction well and incubated at room  
14 temp for 40 min. Next, 15 μl of Kinase detection reagent (Promega kit) was added to the  
15 wells, and plates were incubated for 1 hour. Finally, ATP hydrolysis was quantified by  
16 luminescence measured on the Ensign multimode plate reader (PerkinElmer), and data  
17 was analyzed with Prism 8 software (GraphPad Prism).

## 18 **Cryo- EM sample preparation and data collection.**

### 19 *Cryo-EM Sample Preparation*

20  
21 For the preparation of the inhibitors complex, the purified Polθ-HLD was mixed with a  
22 50-fold molar excess of inhibitor NVB, and incubated on ice for 30 min before applying  
23 for grid preparation.

24  
25 The purified apo Polθ-HLD at a protein concentration of 1mg/mL was applied for grid  
26 preparation on glow-discharged holey gold grids (Quantifoil Au R1.2/1.3, 400mesh) and  
27 GraFuture™ GO grid (Quantifoil Au R1.2/1.3, 400mesh). An aliquot of 4 μL protein  
28 sample of Polθ-HLD-NVB complex at a protein concentration of 0.92 mg/mL was loaded  
29 onto a glow-discharged 400 mesh grid (Quantifoil Au R1.2/1.3), blotted with filter paper  
30 for 3.0 s and 3 blot force, and then plunge-frozen in liquid ethane using a Thermo Fisher  
31 Vitrobot Mark IV.

### 32 *Data Collection*

33  
34 Cryo-EM micrographs were collected on a 300kV Thermo Fisher Titan Krios G3i  
35 electron microscope equipped with a K3 direct detection camera and a BioContinuum  
36 energy filter (GIF: a slit width of 20eV). The micrographs were collected at a calibrated  
37 magnification of x105,000, yielding a pixel size of 0.3345 Å at a super-resolution mode.  
38 In total, 1,824 micrographs were collected at an accumulated electron dose of 50e<sup>-</sup>Å<sup>-2</sup> s<sup>-1</sup>  
39 on each micrograph that was fractionated into a stack of 32 frames with a defocus  
40 range of -1.0 μm to -2.0 μm.

## 41 **Cryo-EM data processing, model building, and refinement**

### 42 *Image processing*

1 Beam-induced motion correction was performed on the stack of frames using  
2 MotionCorr2<sup>53</sup>. The contrast transfer function (CTF) parameters were determined by  
3 CTFFIND4<sup>54</sup>. A total 1,824 good micrographs were selected for further data processing  
4 using cryoSPARC<sup>55</sup>. These micrographs were then curated to remove suboptimal data,  
5 leaving 1,599 micrographs. 1,311,914 Particles were auto-picked by the blob picker and  
6 template picker program in cryoSPARC. After 2 rounds of 2D classification, 655,791  
7 particles were selected from good 2D classes and were subjected to *ab-initio*  
8 reconstruction, followed by heterogeneous refinement. Further homogeneous  
9 refinement and non-uniform refinement were conducted for 311,924 particles from the  
10 best 3D classes without applying symmetry, which resulted in a 3.14 Å map for the Polθ  
11 -HLD-NVB complex protein based on the gold-standard Fourier shell correlation  
12 criterion at FSC=0.143. The local resolution was then calculated on the final density  
13 map.

14

#### 15 *Model building and refinement*

16 The model of Polθ-HLD-NVB complex was built by fitting a structure of the complex  
17 (predicted by AlphaFold2) into the density map using UCSF Chimera<sup>56-57</sup>, followed by a  
18 manual model building of the complex molecules in COOT<sup>58</sup> and a real space  
19 refinement in PHENIX<sup>59</sup>. The model statistics were listed in Supplementary Table 1.

20

21

22

23

## 1 Reference

- 2 1. Khanna, K. K. & Jackson, S. P. DNA double-strand breaks: signaling, repair and the cancer  
3 connection. *Nat Genet* 27, 247–254 (2001).
- 4 2. Roos, W. P., Thomas, A. D. & Kaina, B. DNA damage and the balance between survival and  
5 death in cancer biology. *Nat Rev Cancer* 16, 20–33 (2016).
- 6 3. Cybulla, E. & Vindigni, A. Leveraging the replication stress response to optimize cancer  
7 therapy. *Nat Rev Cancer* 1–19 (2022) doi:10.1038/s41568-022-00518-6.
- 8 4. Li, X. & Heyer, W.-D. Homologous recombination in DNA repair and DNA damage  
9 tolerance. *Cell Res* 18, 99–113 (2008).
- 10 5. Lieber, M. R. The Mechanism of Double-Strand DNA Break Repair by the Nonhomologous  
11 DNA End-Joining Pathway. *Annu Rev Biochem* 79, 181–211 (2010).
- 12 6. Ramsden, D. A., Carvajal-Garcia, J. & Gupta, G. P. Mechanism, cellular functions and cancer  
13 roles of polymerase-theta-mediated DNA end joining. *Nat Rev Mol Cell Bio* 23, 125–140 (2022).
- 14 7. Ceccaldi, R. *et al.* Homologous-recombination-deficient tumours are dependent on Pol $\theta$ -  
15 mediated repair. *Nature* 518, 258–262 (2015).
- 16 8. Schrempf, A., Slyskova, J. & Loizou, J. I. Targeting the DNA Repair Enzyme Polymerase  $\theta$  in  
17 Cancer Therapy. *Trends Cancer* 7, 98–111 (2020).
- 18 9. Seki, M., Marini, F. & Wood, R. D. POLQ (Pol  $\theta$ ), a DNA polymerase and DNA-dependent  
19 ATPase in human cells. *Nucleic Acids Res* 31, 6117–6126 (2003).
- 20 10. Kent, T., Chandramouly, G., McDevitt, S. M., Ozdemir, A. Y. & Pomerantz, R. T.  
21 Mechanism of microhomology-mediated end-joining promoted by human DNA polymerase  $\theta$ .  
22 *Nat Struct Mol Biol* 22, 230–237 (2015).
- 23 11. Mateos-Gomez, P. A. *et al.* The helicase domain of Pol $\theta$  counteracts RPA to promote alt-  
24 NHEJ. *Nat Struct Mol Biol* 24, 1116–1123 (2017).
- 25 12. Newman, J. A., Cooper, C. D. O., Aitkenhead, H. & Gileadi, O. Structure of the Helicase  
26 Domain of DNA Polymerase Theta Reveals a Possible Role in the Microhomology-Mediated  
27 End-Joining Pathway. *Structure* 23, 2319–2330 (2015).
- 28 13. Zahn, K. E., Averill, A. M., Aller, P., Wood, R. D. & Doublié, S. Human DNA polymerase  $\theta$   
29 grasps the primer terminus to mediate DNA repair. *Nat Struct Mol Biol* 22, 304–311 (2015).
- 30 14. Black, S. J. *et al.* Molecular basis of microhomology-mediated end-joining by purified full-  
31 length Pol $\theta$ . *Nat Commun* 10, 4423 (2019).

- 1 15. Mateos-Gomez, P. A. *et al.* Mammalian polymerase  $\theta$  promotes alternative NHEJ and  
2 suppresses recombination. *Nature* 518, 254–257 (2015).
- 3 16. Zatreanu, D. *et al.* Pol $\theta$  inhibitors elicit BRCA-gene synthetic lethality and target PARP  
4 inhibitor resistance. *Nat Commun* 12, 3636 (2021).
- 5 17. Bubenik, M. *et al.* Identification of RP-6685, an Orally Bioavailable Compound that Inhibits  
6 the DNA Polymerase Activity of Pol $\theta$ . *J Med Chem* 65, 13198–13215 (2022).
- 7 18. Zhou, J. *et al.* A first-in-class polymerase theta inhibitor selectively targets homologous-  
8 recombination-deficient tumors. *Nat Cancer* 2, 598–610 (2021).
- 9 19. Newman, J. A., Cooper, C. D. O., Aitkenhead, H. & Gileadi, O. Structure of the Helicase  
10 Domain of DNA Polymerase Theta Reveals a Possible Role in the Microhomology-Mediated  
11 End-Joining Pathway. *Structure* 23, 2319–2330 (2015).
- 12 20. Büttner, K., Nehring, S. & Hopfner, K.-P. Structural basis for DNA duplex separation by a  
13 superfamily-2 helicase. *Nat Struct Mol Biol* 14, 647–652 (2007).
- 14 21. Wyatt, D. W. *et al.* Essential Roles for Polymerase  $\theta$ -Mediated End Joining in the Repair of  
15 Chromosome Breaks. *Mol Cell* 63, 662–673 (2016).
- 16 22. Black, S. J. *et al.* Molecular basis of microhomology-mediated end-joining by purified full-  
17 length Pol $\theta$ . *Nat Commun* 10, 4423 (2019).
- 18 23. Lewis, R. J. *et al.* The nature of inhibition of DNA gyrase by the coumarins and the  
19 cyclothialidines revealed by X-ray crystallography. *Embo J* 15, 1412–1420 (1996).
- 20 24. Wood, R. D. & Doublé, S. DNA polymerase  $\theta$  (POLQ), double-strand break repair, and  
21 cancer. *Dna Repair* 44, 22–32 (2016).
- 22 25. Richards, J. D. *et al.* Structure of the DNA Repair Helicase Hel308 Reveals DNA Binding  
23 and Autoinhibitory Domains\*. *J Biol Chem* 283, 5118–5126 (2008).
- 24 26. Oyama, T. *et al.* Atomic structures and functional implications of the archaeal RecQ-like  
25 helicase Hjm. *Bmc Struct Biol* 9, 2 (2009).
- 26 27. Büttner, K., Nehring, S. & Hopfner, K.-P. Structural basis for DNA duplex separation by a  
27 superfamily-2 helicase. *Nat Struct Mol Biol* 14, 647–652 (2007).
- 28 28. Lamour, V., Hoermann, L., Jeltsch, J.-M., Oudet, P. & Moras, D. An Open Conformation of  
29 the *Thermus thermophilus* Gyrase B ATP-binding Domain\*. *J Biol Chem* 277, 18947–18953  
30 (2002).

- 1 29. Holdgate, G. A. *et al.* The Entropic Penalty of Ordered Water Accounts for Weaker Binding  
2 of the Antibiotic Novobiocin to a Resistant Mutant of DNA Gyrase: A Thermodynamic and  
3 Crystallographic Study ‡. *Biochemistry-us* 36, 9663–9673 (1997).
- 4 30. Lu, J. *et al.* Structures of Kibdelomycin Bound to *Staphylococcus aureus* GyrB and ParE  
5 Showed a Novel U-Shaped Binding Mode. *Acs Chem Biol* 9, 2023–2031 (2014).
- 6 31. Henderson, S. R. *et al.* Structural and mechanistic analysis of ATPase inhibitors targeting  
7 mycobacterial DNA gyrase. *J Antimicrob Chemoth* 75, dkaa286- (2020).
- 8 32. Bellon, S. *et al.* Crystal Structures of *Escherichia coli* Topoisomerase IV ParE Subunit (24  
9 and 43 Kilodaltons): a Single Residue Dictates Differences in Novobiocin Potency against  
10 Topoisomerase IV and DNA Gyrase. *Antimicrob Agents Ch* 48, 1856–1864 (2004).
- 11 33. Donnelly, A. & Blagg, B. Novobiocin and Additional Inhibitors of the Hsp90 C-Terminal  
12 Nucleotide- binding Pocket. *Curr Med Chem* 15, 2702–2717 (2008).
- 13 34. Owens, T. W. *et al.* Structural basis of unidirectional export of lipopolysaccharide to the cell  
14 surface. *Nature* 567, 550–553 (2019).
- 15 35. May, J. M. *et al.* The Antibiotic Novobiocin Binds and Activates the ATPase That Powers  
16 Lipopolysaccharide Transport. *J Am Chem Soc* 139, 17221–17224 (2017).
- 17 36. Hartmann, M. *et al.* Demonstrating Ligandability of the LC3A and LC3B Adapter Interface.  
18 *J Med Chem* 64, 3720–3746 (2021).
- 19 37. Stefanachi, A., Leonetti, F., Pisani, L., Catto, M. & Carotti, A. Coumarin: A Natural,  
20 Privileged and Versatile Scaffold for Bioactive Compounds. *Mol J Synthetic Chem Nat Prod*  
21 *Chem* 23, 250 (2018).
- 22 38. Khadka, P., Croteau, D. L. & Bohr, V. A. RECQL5 has unique strand annealing properties  
23 relative to the other human RecQ helicase proteins. *Dna Repair* 37, 53–66 (2016).
- 24 39. Ozdemir, A. Y., Rusanov, T., Kent, T., Siddique, L. A. & Pomerantz, R. T. Polymerase  $\theta$ -  
25 helicase efficiently unwinds DNA and RNA-DNA hybrids. *J Biol Chem* 293, 5259–5269 (2018).
- 26 40. Carvajal-Garcia, J. *et al.* Mechanistic basis for microhomology identification and genome  
27 scarring by polymerase theta. *Proc National Acad Sci* 117, 8476–8485 (2020).
- 28 41. Schaub, J. M., Soniat, M. M. & Finkelstein, I. J. Polymerase theta-helicase promotes end  
29 joining by stripping single-stranded DNA-binding proteins and bridging DNA ends. *Nucleic*  
30 *Acids Res* 50, 3911–3921 (2022).
- 31 42. Brissett, N. C. *et al.* Structure of a NHEJ Polymerase-Mediated DNA Synaptic Complex.  
32 *Science* 318, 456–459 (2007).



- 1 43. Chaplin, A. K. *et al.* Cryo-EM of NHEJ supercomplexes provides insights into DNA repair.  
2 *Mol Cell* 81, 3400-3409.e3 (2021).
- 3 44. Williams, R. S. *et al.* Mre11 Dimers Coordinate DNA End Bridging and Nuclease Processing  
4 in Double-Strand-Break Repair. *Cell* 135, 97–109 (2008).
- 5 45. Krissinel, E. & Henrick, K. Inference of Macromolecular Assemblies from Crystalline State.  
6 *J Mol Biol* 372, 774–797 (2007).
- 7 46. Kawamura, K. *et al.* DNA polymerase  $\theta$  is preferentially expressed in lymphoid tissues and  
8 upregulated in human cancers. *Int J Cancer* 109, 9–16 (2004).
- 9 47. Lemée, F. *et al.* DNA polymerase  $\theta$  up-regulation is associated with poor survival in breast  
10 cancer, perturbs DNA replication, and promotes genetic instability. *Proc National Acad Sci* 107,  
11 13390–13395 (2010).
- 12 48. Schrempf, A., Slyskova, J. & Loizou, J. I. Targeting the DNA Repair Enzyme Polymerase  $\theta$   
13 in Cancer Therapy. *Trends Cancer* 7, 98–111 (2020).
- 14 49. KIRBY, W. M. M., HUDSON, D. G. & NOYES, W. D. Clinical and Laboratory Studies of  
15 Novobiocin, a New Antibiotic. *M Archives Intern Medicine* 98, 1–7 (1956).
- 16 50. Mattern, M. R. & Scudiero, D. A. Dependence of mammalian DNA synthesis on DNA  
17 supercoiling. III Characterization of the inhibition of replicative and repair-type DNA synthesis  
18 by novobiocin and nalidixic acid. *Biochimica Et Biophysica Acta Bba - Nucleic Acids Protein*  
19 *Synthesis* 653, 248–258 (1981).
- 20 51. Eder, J. P., Teicher, B. A., Holden, S. A., Cathcart, K. N. & Schnipper, L. E. Novobiocin  
21 enhances alkylating agent cytotoxicity and DNA interstrand crosslinks in a murine model. *J Clin*  
22 *Invest* 79, 1524–1528 (1987).
- 23 52. Kennedy, M. J. *et al.* Phase I and pharmacologic study of the alkylating agent modulator  
24 novobiocin in combination with high-dose chemotherapy for the treatment of metastatic breast  
25 cancer. *J Clin Oncol* 13, 1136–1143 (1995).
- 26 53. Eder, J. P., Wheeler, C. A., Teicher, B. A. & Schnipper, L. E. A phase I clinical trial of  
27 novobiocin, a modulator of alkylating agent cytotoxicity. *Cancer Res* 51, 510–3 (1991).
- 28 54. Hahm, H. A. *et al.* Novobiocin in combination with high-dose chemotherapy for the  
29 treatment of advanced breast cancer: A phase 2 study. *Biol Blood Marrow Tr* 6, 335–343 (2000).
- 30 55. Shiozawa, K. *et al.* Reversal of breast cancer resistance protein (BCRP/ABCG2)-mediated  
31 drug resistance by novobiocin, a coumermycin antibiotic. *Int. J. Cancer* 108, 146–151 (2004).
- 32 56. Burlison, J. A. *et al.* Development of Novobiocin Analogues That Manifest Anti-proliferative  
33 Activity against Several Cancer Cell Lines. *J Org Chem* 73, 2130–2137 (2008).

1 57. Burlison, J. A., Neckers, L., Smith, A. B., Maxwell, A. & Blagg, B. S. J. Novobiocin:  
2 Redesigning a DNA Gyrase Inhibitor for Selective Inhibition of Hsp90. *J Am Chem Soc* 128,  
3 15529–15536 (2006).

4

5 **Funding:** This research was funded by Shuimu BioSciences.

6

7 **Contributions:**

8 H.B.G and Y.T.H performed protein expression and purification experiments, Y.X.W and  
9 H.M.Z. prepared grid, collected data, and processed data, J.M. performed functional  
10 assay, Y.X.W, H.M.Z, Y.D.H, and J.L. built and refine the model, and assisted structure  
11 analysis, Y.J.L, G.Z., X.D.N, F.Y.Z., J.H, and A.G supervised the project experiments  
12 and analyzed the data, X.D.N, F.Y.Z., J.H. wrote the manuscript.

13

14

## 1 Figure legends

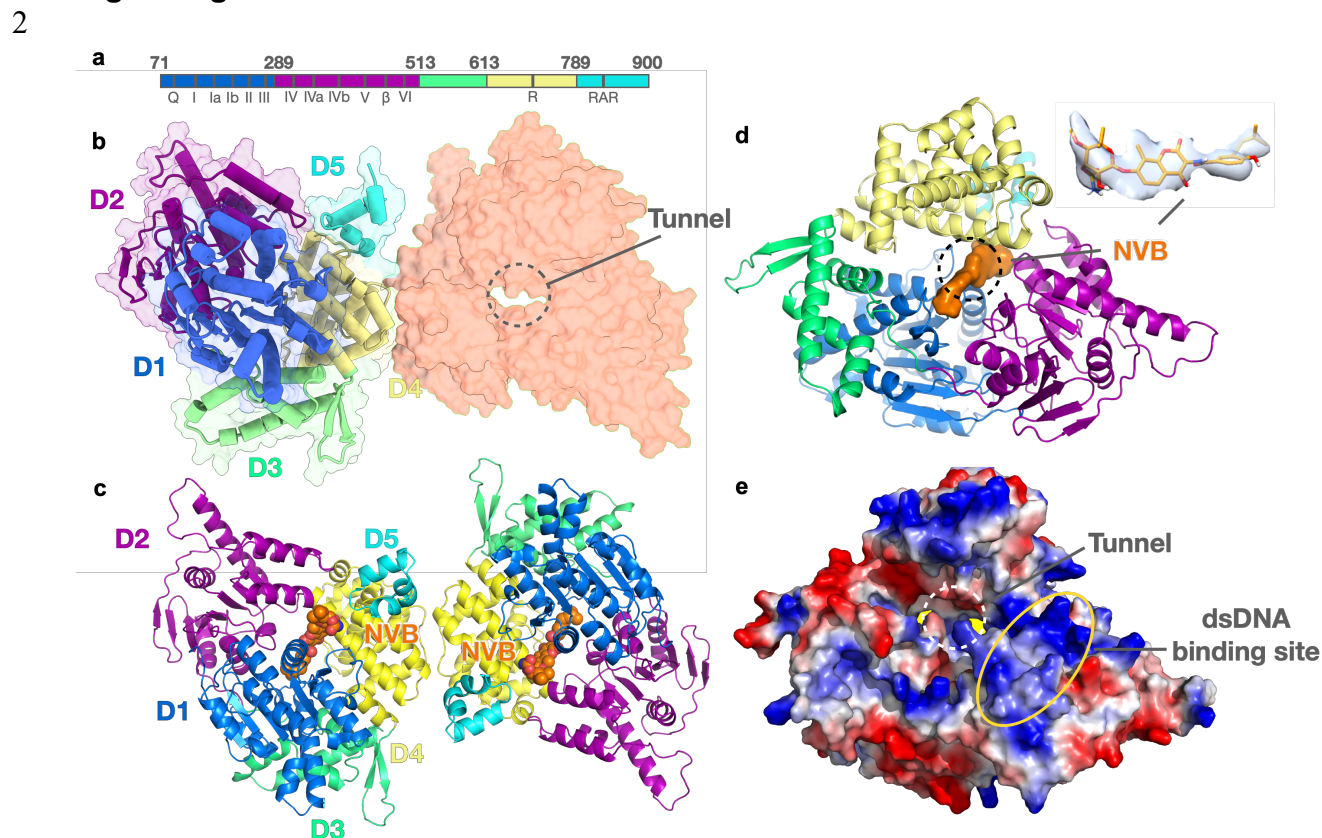

3

4 **Fig. 1 The overall structure of dimeric Polθ-HLD in complex with novobiocin**

5 (a). Schematic domains and conserved motifs of Polθ-HLD. Domain boundaries are

6 indicated on top, and sequence motifs beneath with abbreviations and roman numerals.

7 Q: motif Q; β: β-hairpin; R: ratchet helix; RAR: RAR motif. Domains 1 to 5 are colored

8 blue, purple, green, yellow, and cyan respectively. (b). The apo dimeric Polθ-HLD, NVB

9 is shown as brown spheres. All five domains pack together to form a ring-shaped

10 structure with a central tunnel for ssDNA binding. (c). The dimeric Polθ-HLD-NVB

11 complex, NVB is shown as brown spheres. (d). The ligand density of NVB locates in the

12 central tunnel. (e). The electrostatic surface of Polθ-HLD, the putative dsDNA binding

13 site is highlighted with a yellow ellipse.

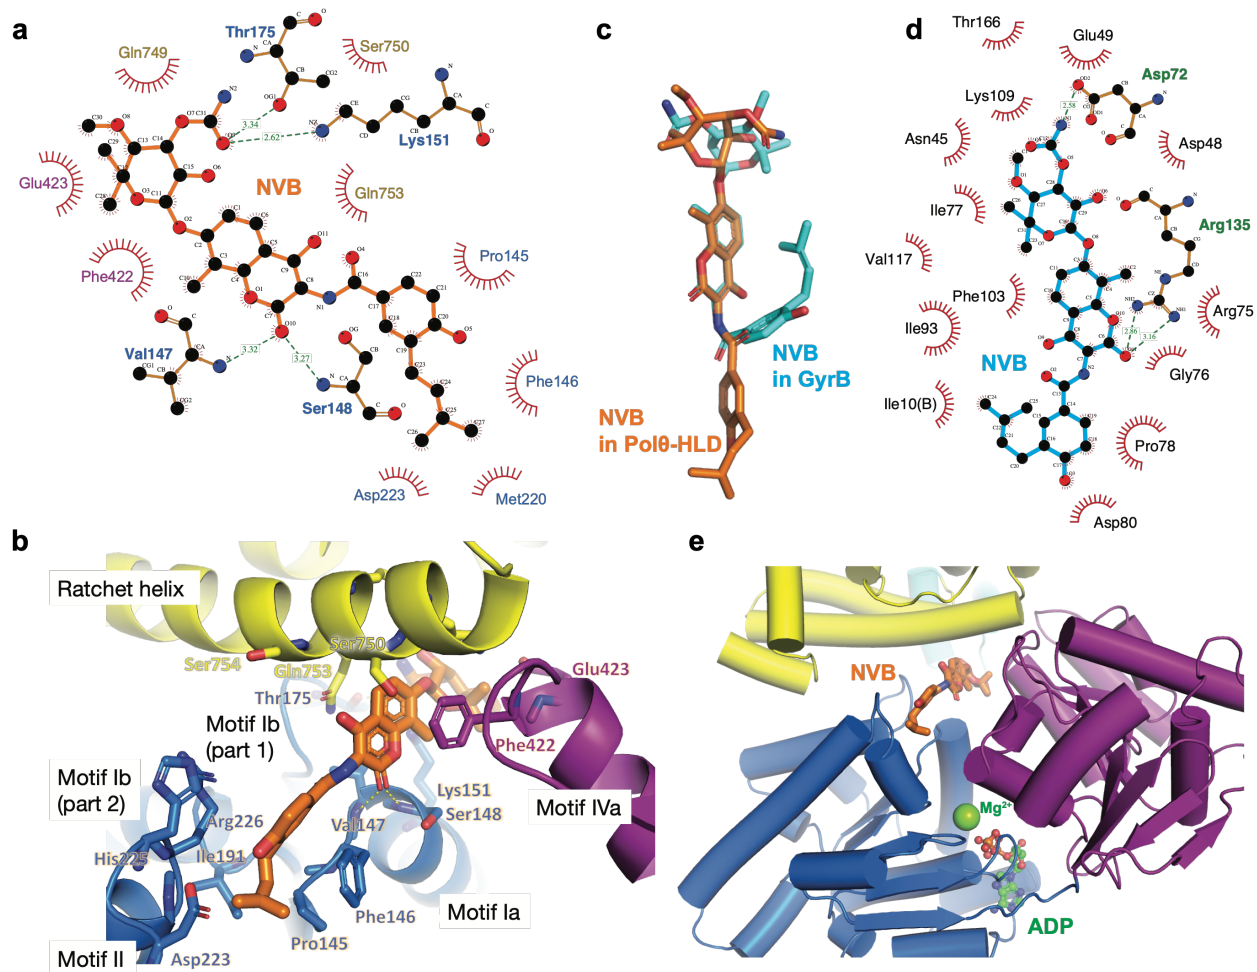

## Fig. 2 The inhibitor binding site in the Polθ-HLD

(a). The binding site of NVB in the Polθ-HLD analyzed with LigPlot<sup>+</sup> software, residues from domains 1, 2, and 4 are colored with blue, purple, and yellow, respectively. Hydrogen bonds are highlighted with a dashed line. (b). The NVB binding pocket in the Polθ-HLD. The NVB is shown as brown sticks, and domains 1, 2, and 4 are colored blue, purple, and yellow, respectively. (c) The comparison of NVB in the extended conformation (Polθ-HLD) and bend conformation (GyrB, PDB ID: 1KIJ). (d) The binding site of NVB in the GyrB (PDB ID: 1KIJ). (e) The NVB binding site is away from the classical ATP binding pocket (ADP model from PDB ID: 5a9f).

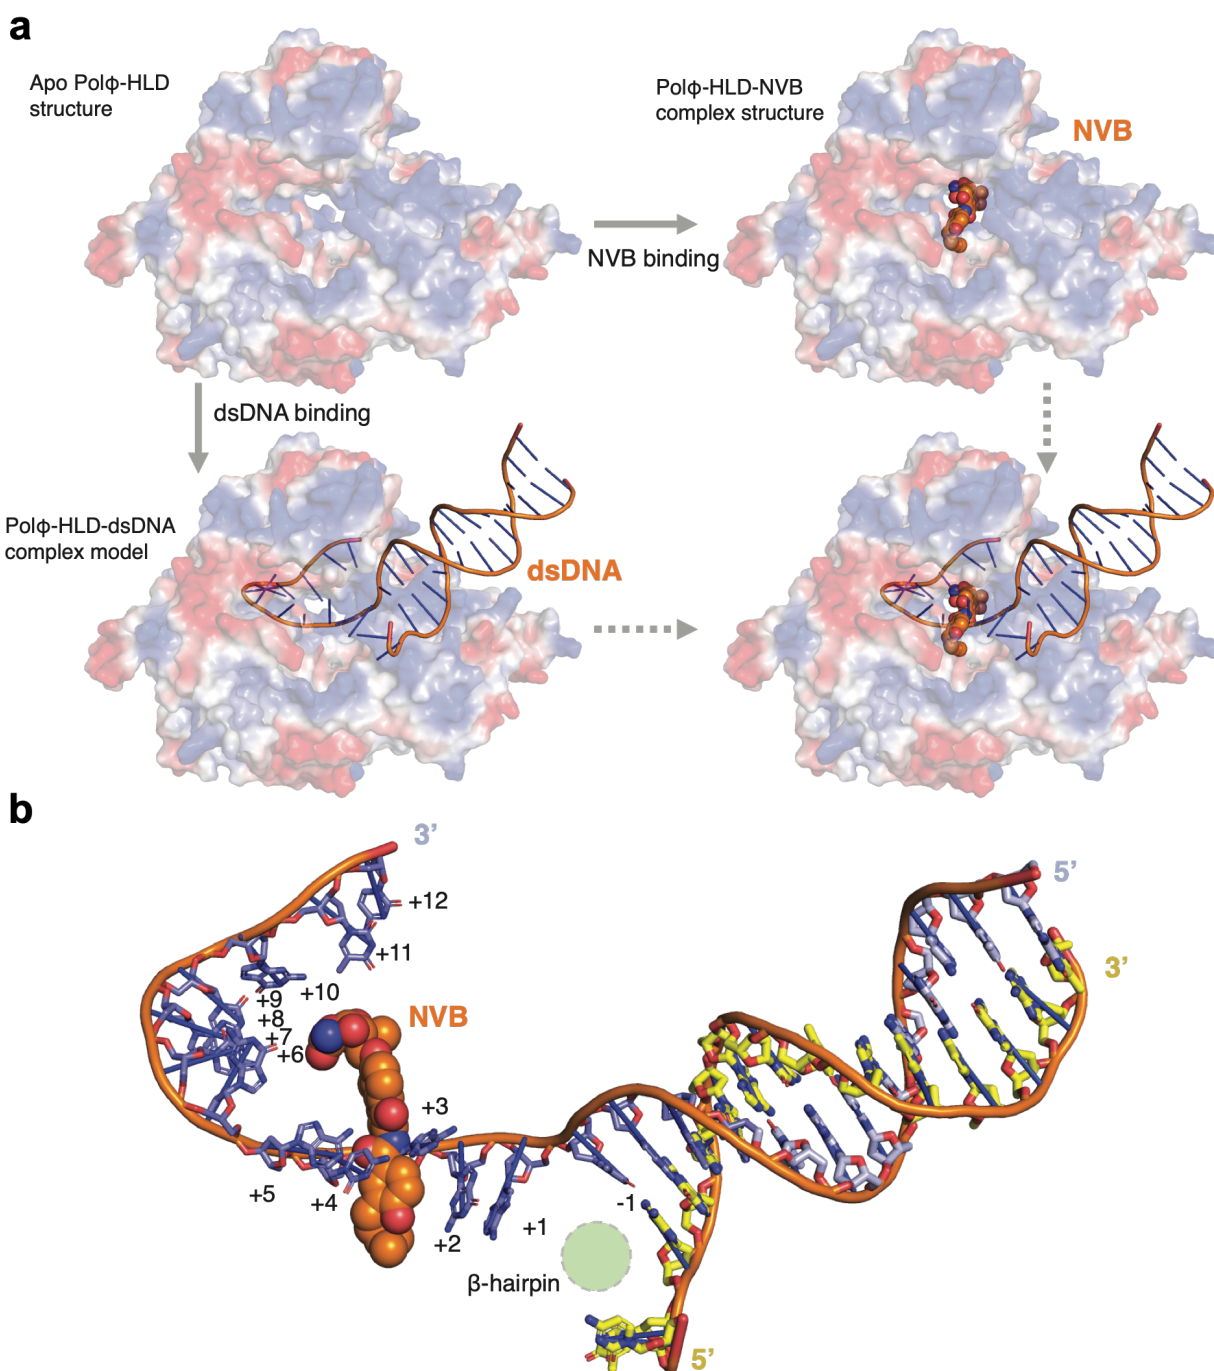

1

## 2 **Fig. 3 The inhibitory mechanism of NVB**

3 (a). Possible models of NVB and ssDNA binding Polθ-HLD are constructed by homolog  
4 modeling with the Hel308-DNA complex (PDB ID: 2P6R). Overlaying the inhibitor  
5 binding structure and dsDNA complex model indicates that they directly compete. (b). A  
6 detailed structural model of the inhibition mechanism. The NVB binding site is closed to  
7 the β-hairpin. The NVB vertically wedges between the third and fourth unpaired bases  
8 of the overhang ssDNA.

## 1 Supplementary Figures

2

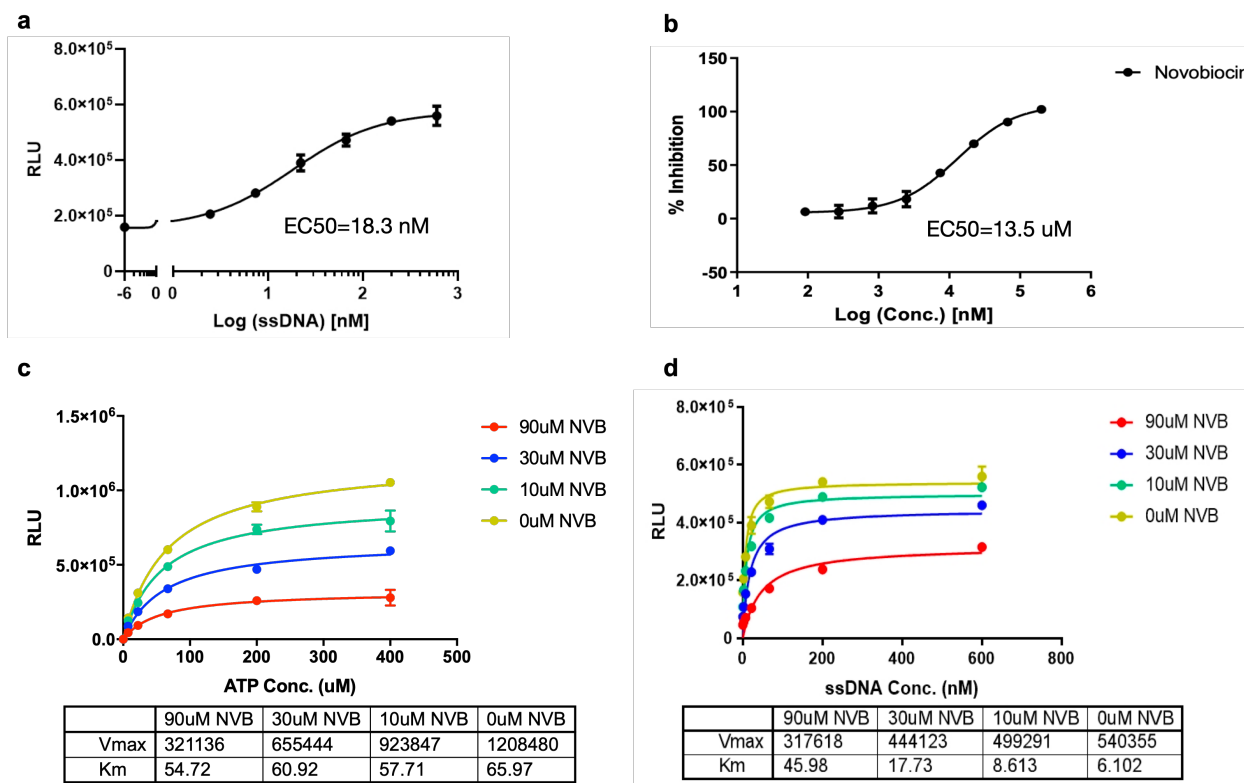

3

### 4 Fig S1. The functional validation of NVB inhibitory effect on ATPase activity

5 (a). The ssDNA stimulates the ATPase activity of Polθ-HLD with an EC50 of about 18.3

6 nM. (b). The dose-response curve of NVB inhibits ATPase activity with EC50 of about

7 13 uM. The maximized inhibition at 200uM NVB was normalized to 100% inhibition. (c).

8 The ATP competition assay. The NVB exhibits non-competitive inhibition with respect to

9 ATP. (d) The ssDNA competition assay. The NVB exhibits competitive inhibition with

10 respect to ssDNA. Each data point represents the mean ± SD from two technical

11 replicates.

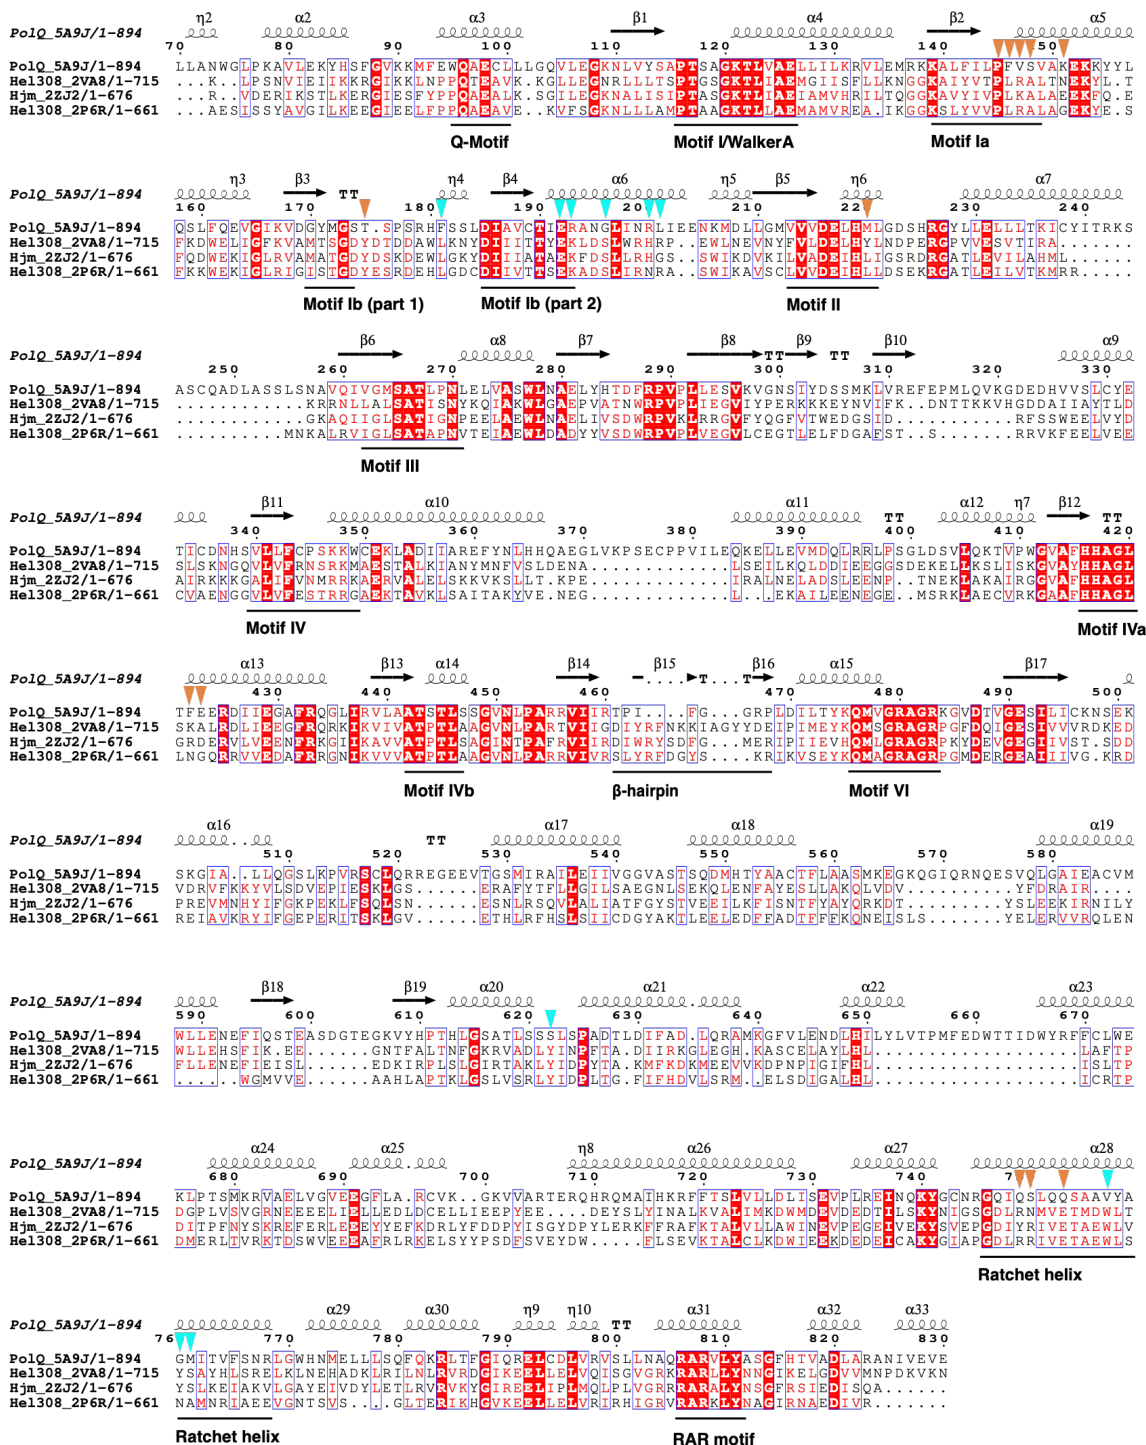

1  
 2 **Fig S2. The sequence alignment and conserved motifs of four superfamily 2**  
 3 **helicases with crystal structures.**  
 4 The selected regions of Polθ-HLD (residues 70-830) were annotated, and the medium-  
 5 conserved residues of those four proteins are shown in red text, and the high-conserved

1 residues are shown in white text with red background. The secondary structure of Polθ-  
2 HLD on top of the alignment was automatically generated with ESPript 3.0 server. The  
3 residues that interact with NVB and 236 were noted as brown and cyan triangles,  
4 respectively.

5  
6

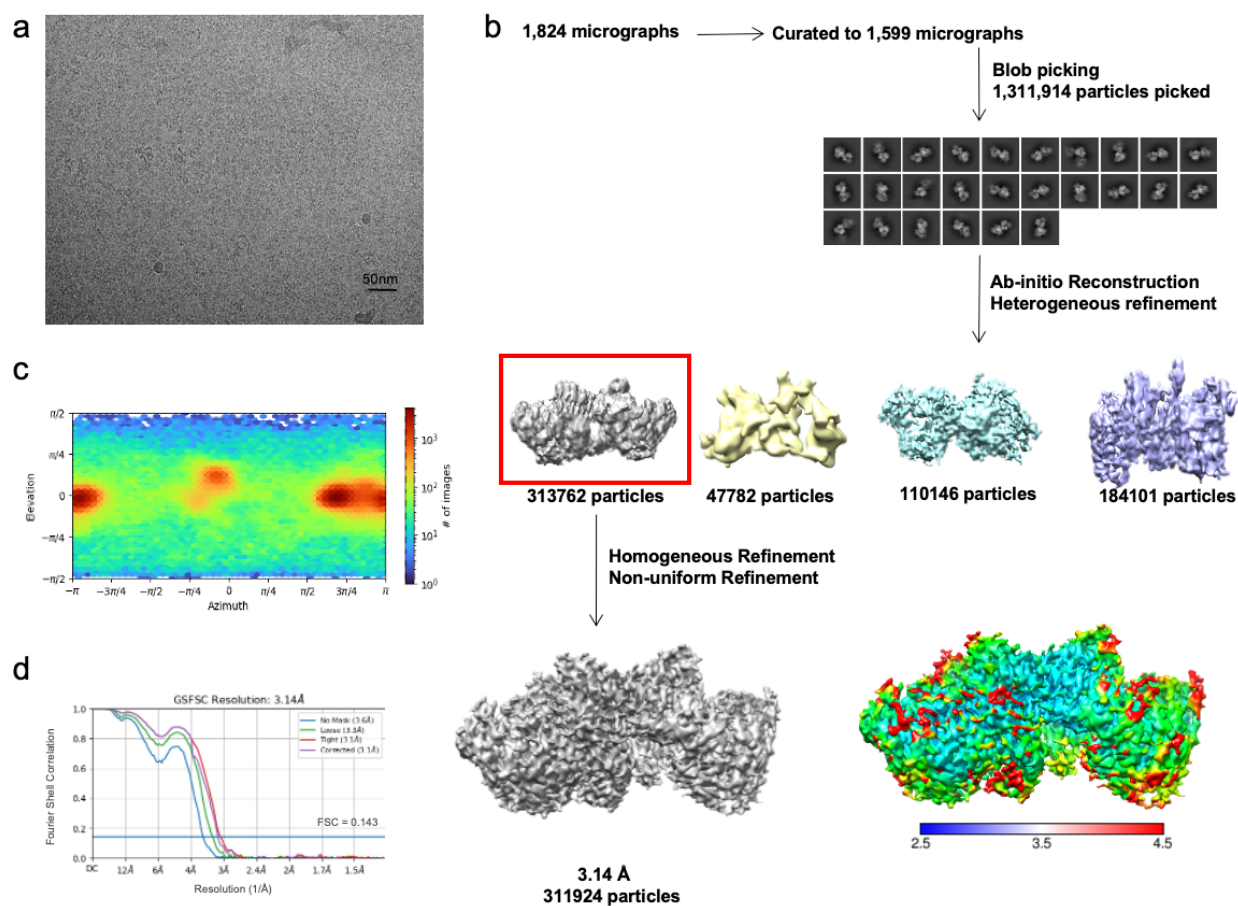

7

### 8 **Fig S3. Cryo-EM analysis of the Polθ-HLD**

9 (a). The micrograph of Polθ-HLD. (b). Flow chart for cryo-EM data processing of the  
10 Polθ-HLD. (c). Direction distribution of particles in the final Polθ-HLD refinement. (d).  
11 FSC curves of the final Polθ-HLD map and model validation.

12

13

14

15



1 **Table 1. Cryo-EM data collection, refinement, and validation statistics**

|                                                     | Apo Polθ-HLD<br>Consensus map | Polθ-HLD<br>Consensus map |
|-----------------------------------------------------|-------------------------------|---------------------------|
| <b>Data collection and processing</b>               |                               |                           |
| Microscope                                          | KriosG4                       | Titan KriosG3i            |
| Camera                                              | Falcon 4                      | K3                        |
| Imaging mode                                        | Counted resolution            | Counted super resolution  |
| Magnification                                       | 96k                           | 105k                      |
| Voltage (kV)                                        | 300                           | 300                       |
| Electron exposure (e <sup>-</sup> /Å <sup>2</sup> ) | 51.07                         | 50                        |
| Defocus range (μm)                                  | -1.0~-2.0                     | -1.0~-2.0                 |
| Pixel size (Å)                                      | 0.86                          | 0.669                     |
| Symmetry imposed                                    | C1                            | C1                        |
| Initial particle images (no.)                       | 451,012                       | 655,791                   |
| Final particle images (no.)                         | 265,025                       | 311,924                   |
| Map resolution (Å)                                  | 3.27                          | 3.14                      |
| FSC threshold                                       | 0.143                         | 0.143                     |
| Map resolution range (Å)                            | 2.0-5.0                       | 2.5-4.5                   |
| <b>Refinement</b>                                   |                               |                           |
| Initial model used (PDB code)                       | AF2 predicted                 | AF2 predicted             |
| Model resolution (Å)                                | 3.27                          | 3.14                      |
| FSC threshold                                       | 0.143                         | 0.143                     |
| Model resolution range (Å)                          | 2.0-5.0                       | 2.5-4.5                   |
| Map sharpening <i>B</i> factor (Å <sup>2</sup> )    | -137.2                        | -139.2                    |
| Model composition                                   |                               |                           |
| Protein residues                                    | 1510                          | 1395                      |
| Ligands                                             | 0                             | 2                         |
| R.m.s. deviations                                   |                               |                           |
| Bond lengths (Å)                                    | 0.003                         | 0.003                     |
| Bond angles (°)                                     | 0.562                         | 0.570                     |
| Validation                                          |                               |                           |
| Clashscore                                          | 7.09                          | 8.97                      |
| Rotamers outliers (%)                               | 0.00                          | 0.00                      |
| Ramachandran plot                                   |                               |                           |
| Favored (%)                                         | 97.61                         | 97.06                     |
| Allowed (%)                                         | 2.39                          | 2.87                      |
| Disallowed (%)                                      | 0.00                          | 0.07                      |

2
